# Supplementary material
Source: HighWire-hosted journal article supplement (https://jnm.snmjournals.org/highwire/filestream/94504/field_highwire_adjunct_files/0/132712_Supplemental_Data.pdf)
Supplement: 132712_Supplemental_Data.pdf [file 132712_Supplemental_Data.pdf]

## **SUPPLEMENTAL DATA:**

### **ANIMAL PREPARATION**

Animals were fasted for up to 12 hours prior to imaging. On the imaging day, the animal was anesthetized with intramuscular ketamine (10 mg/kg) and glycopyrrolate (0.1-0.2 mg/kg) at ~2 hours prior to radiotracer injection, transferred to the positron emission tomography (PET) camera, and immediately intubated with an endotracheal tube for continued anesthesia with 1.5-2.5% isoflurane administered through a re-breathing circuit. An intravenous (i.v.) line was established in a cephalic and/or saphenous vein for injection of fluids for hydration and radiotracer injection. For arterial blood samples collection, a line was established in a femoral or radial artery. Body temperature was maintained by heated water blanket and monitored by rectal thermometer. Vital signs, including end tidal CO<sub>2</sub>, SpO<sub>2</sub>, heart rate, respiration rate and blood pressure, were monitored continuously and recorded at least every 15 minutes during the study.

### **BLOOD SAMPLES PROCESSING AND ANALYSIS**

Radioactivity in whole blood and plasma was assessed using a well-type  $\gamma$ -counter using a 400-1400 keV window (Perkin Elmer Wallac 2480, USA). Plasma samples were processed by acetonitrile denaturation and analyzed by HPLC on a Luna C18(2) column with a mobile phase of MeCN/H<sub>2</sub>O-Et<sub>3</sub>N (0.8%) 55/45 at a flow rate of 4 mL/min to estimate the parent fraction. The free protein binding fraction was determined using ultrafiltration units (Centrifree<sup>®</sup> 30K, Millipore).

### **ESTIMATION OF <sup>18</sup>F-MNI698 ID<sub>50</sub> AND UPPER MASS DOSE LIMITS**

The methodology used to estimate the mass doses resulting in 50% receptor occupancy ( $ID_{50}$ ) and to calculate the upper mass dose limits that will result in 5% or 10% receptor occupancy ( $D_5$  or  $D_{10}$ , respectively) was based on previously published literature (1). Briefly, once the  $BP_{NDS}$  measured with the scan using a high mass dose are plotted against the corresponding regional  $BP_{NDS}$  of the scan using a low mass dose, the individual  $ID_{50}$  can then be calculated using the slope ( $\alpha$ ) of the regression line in the occupancy plot, where  $\alpha < 1$  represents the negative effect of higher mass dose on  $BP_{ND}$  measurements (Eq. 1). Then, the upper mass dose limits can be estimated by rearranging the conventional occupancy ( $O$ ) equation (Eq. 2).

$$ID_{50} = \frac{\alpha D_{High} - D_{Low}}{1 - \alpha} \quad (\text{Supplemental})$$

Eq. 1)

$$O = \frac{D}{D + ID_{50}} \quad (\text{Supplemental})$$

Eq. 2)

where D = mass dose.

### OCCUPANCY ESTIMATES - CORRECTION FOR SELF-OCCUPANCY

The correction for self-occupancy applied in this study was based on previously published work (2). In brief:

In the absence of neurotransmitter ( $N=0$ ) and with true radiotracer (i.e. no mass effect,  $T=0$ ), the receptor occupancy ( $O_c$ ) for a certain drug dose can be calculated using:

$$O_c = 1 - \frac{D}{D + ID_{50}^D} = 1 - \frac{1}{1 + \frac{D}{ID_{50}^D}} = \frac{\frac{D}{ID_{50}^D}}{1 + \frac{D}{ID_{50}^D}} = \frac{\delta_m}{1 + \delta_m}$$

(Supplemental Eq. 1)

where  $O_c$  is the measured occupancy in the absence of neurotransmitter and with true radiotracer,  $D$  is the drug dose,  $ID_{50}^D$  is the drug dose resulting in 50% receptor occupancy and

$$\delta_m = \frac{D}{ID_{50}^D}.$$

When  $N>0$  and  $T>0$  then  $O_m$  is:

$$O_m = 1 - \frac{1}{1 + \frac{T}{ID_{50}^T} + \frac{D}{ID_{50}^D} + \frac{N}{ID_{50}^N}} = 1 - \frac{1}{1 + \tau_T + \delta_m + \tau_N}$$

(Supplemental Eq. 2)

where  $O_m$  is the measured occupancy,  $T$  is the radiotracer mass dose,  $N$  is the neurotransmitter mass dose,  $ID_{50}^T$  is the tracer dose resulting in 50% receptor occupancy,  $ID_{50}^N$  is the

neurotransmitter dose resulting in 50% receptor occupancy,  $\tau_T = \frac{T}{ID_{50}^T}$  and  $\tau_N = \frac{N}{ID_{50}^N}$ .

Now considering the case of a baseline study with no drug and a pre-blocking study with drug, and ignoring the neurotransmitter effects,  $O_m$  is:

$$\begin{aligned}
O_m &= \frac{O_{Drug} - O_{Baseline}}{1 - O_{Baseline}} = \frac{\left(1 - \frac{1}{1 + \tau_T^{Drug} + \delta_m^{Drug}}\right) - \left(1 - \frac{1}{1 + \tau_T^{Baseline}}\right)}{1 - \left(1 - \frac{1}{1 + \tau_T^{Baseline}}\right)} \\
&= \frac{\left(\frac{1}{1 + \tau_T^{Baseline}}\right) - \left(\frac{1}{1 + \tau_T^{Drug} + \delta_m^{Drug}}\right)}{\left(\frac{1}{1 + \tau_T^{Baseline}}\right)} \\
&= 1 - \frac{1 + \tau_T^{Baseline}}{1 + \tau_T^{Drug} + \delta_m^{Drug}} \\
&= \frac{\tau_T^{Drug} - \tau_T^{Baseline} + \delta_m^{Drug}}{1 + \tau_T^{Drug} + \delta_m^{Drug}} \tag{Eq. 3}
\end{aligned}$$

In order to extract true drug occupancy in the absence of radiotracer mass and ignoring neurotransmitter effects ( $O_c$ ) from the measured value ( $O_m$ ), Eq. 1 is reversed:

$$\delta_m^{Drug} = \frac{O_c}{1 - O_c} \tag{Eq. 4}$$

and plugged into Eq. 3:

$$O_m = \frac{\tau_T^{Drug} - \tau_T^{Baseline} + \frac{O_c}{1 - O_c}}{1 + \tau_T^{Drug} + \frac{O_c}{1 - O_c}} \tag{Eq. 5}$$

Further arrangement of Eq. 5 yields:

$$O_c = \frac{O_m (1 + \tau_{Drug}) + \tau_{Baseline} - \tau_{Drug}}{1 - \tau_{Drug} + \tau_{Baseline} + O_m \tau_{Drug}} \tag{Eq. 6}$$

where  $O_c$  is the measured occupancy corrected for self-occupancy,  $O_m$  is the measured occupancy and  $\tau = \frac{T}{ID_{50}}$ , with  $T$ =mass dose concentration at baseline or at blockade conditions (drug study) and  $ID_{50}$  is the mass doses resulting in 50% receptor occupancy determined from the mass effect study.

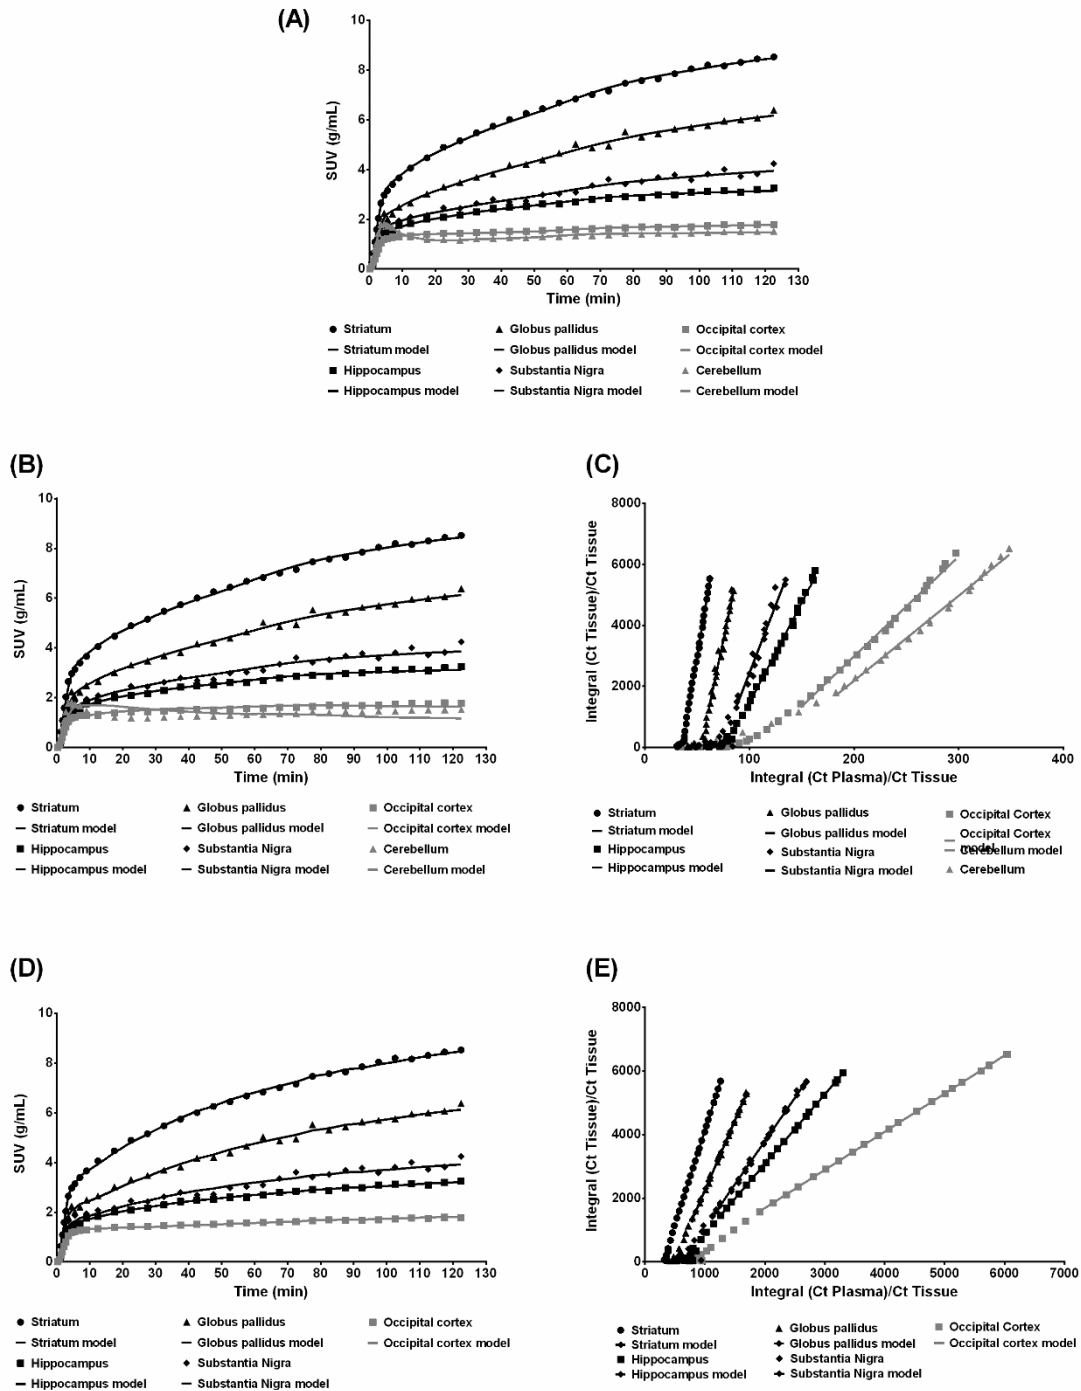

**SUPPLEMENTAL FIGURE 1.** Representative time-activity curves in selected brain regions fitted with different kinetic models: 2T (A), 1T (B), Logan graphical plot with arterial input function (C), SRTM (D) and Logan non-invasive (E). For the non-invasive methods of analysis (SRTM and Logan non-invasive) the cerebellum was used as reference region.

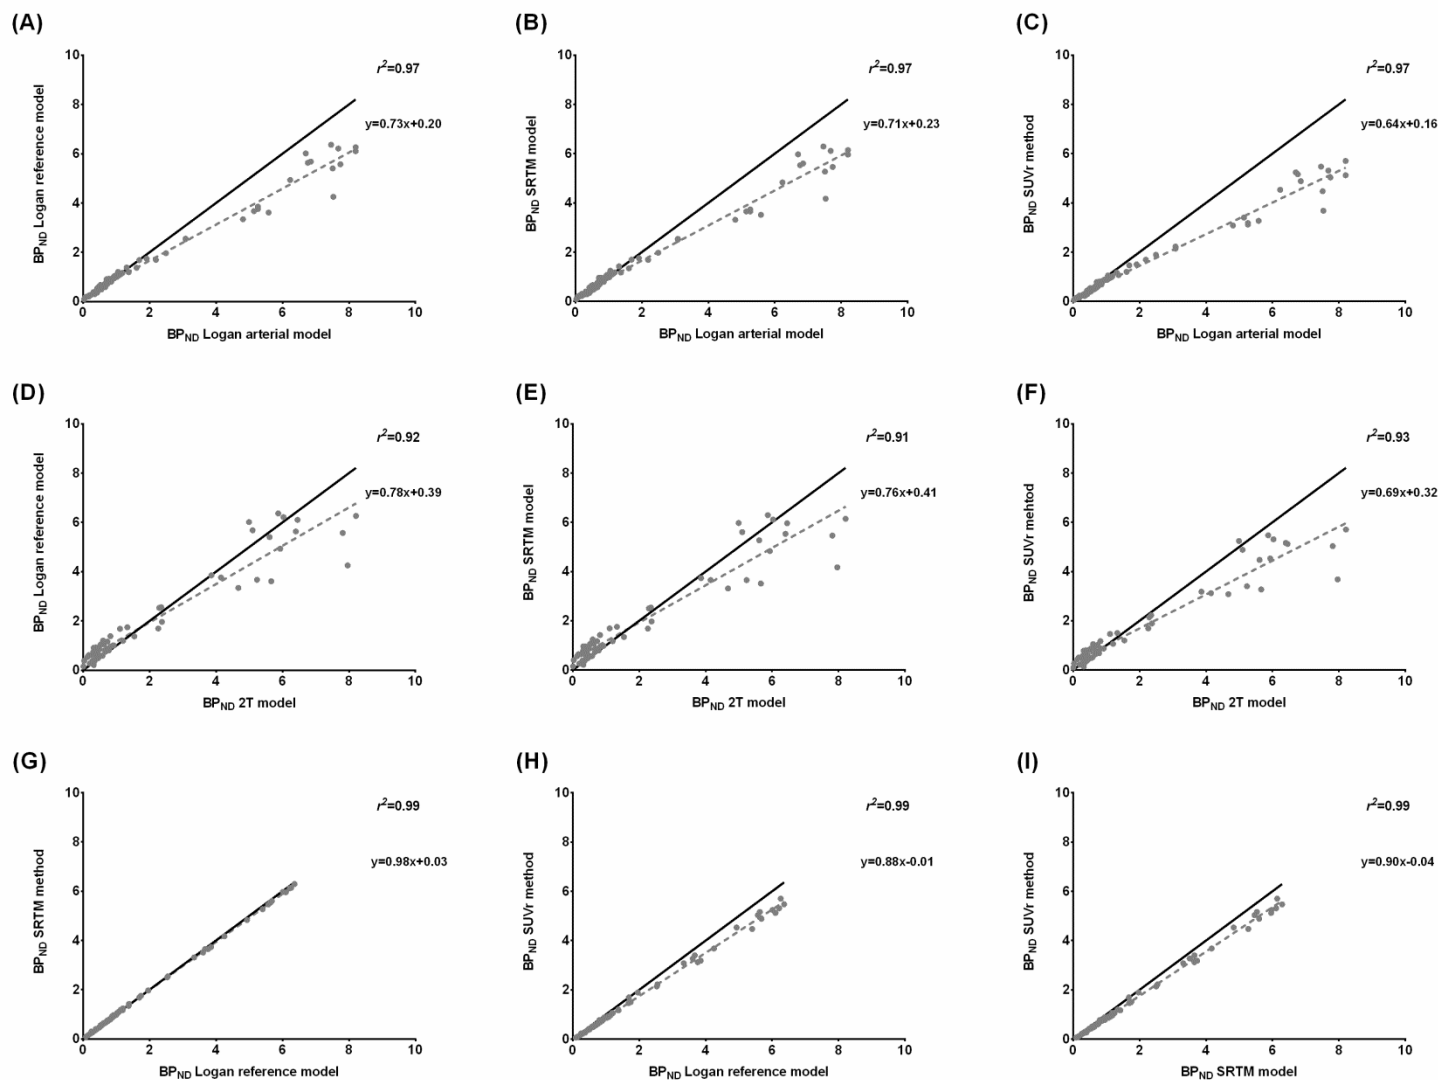

**SUPPLEMENTAL FIGURE 2.** Comparative analysis of  $BP_{ND}$  values determined using multiple methods. (A) Logan invasive versus Logan non-invasive; (B) Logan invasive versus SRTM; (C) Logan invasive versus SUVr method; (D) 2T versus Logan non-invasive; (E) 2T versus SRTM; (F) 2T versus SUVr method; (G) Logan non-invasive versus SRTM; (H) Logan non-invasive versus SUVr method; and (I) SRTM versus SUVr method. Note the underestimation of  $BP_{ND}$  values when the non-invasive methods of quantification are used, in comparison with invasive methods (2T and Logan arterial). This is particularly evident in the regions with high density of 5HT<sub>4</sub> receptors.

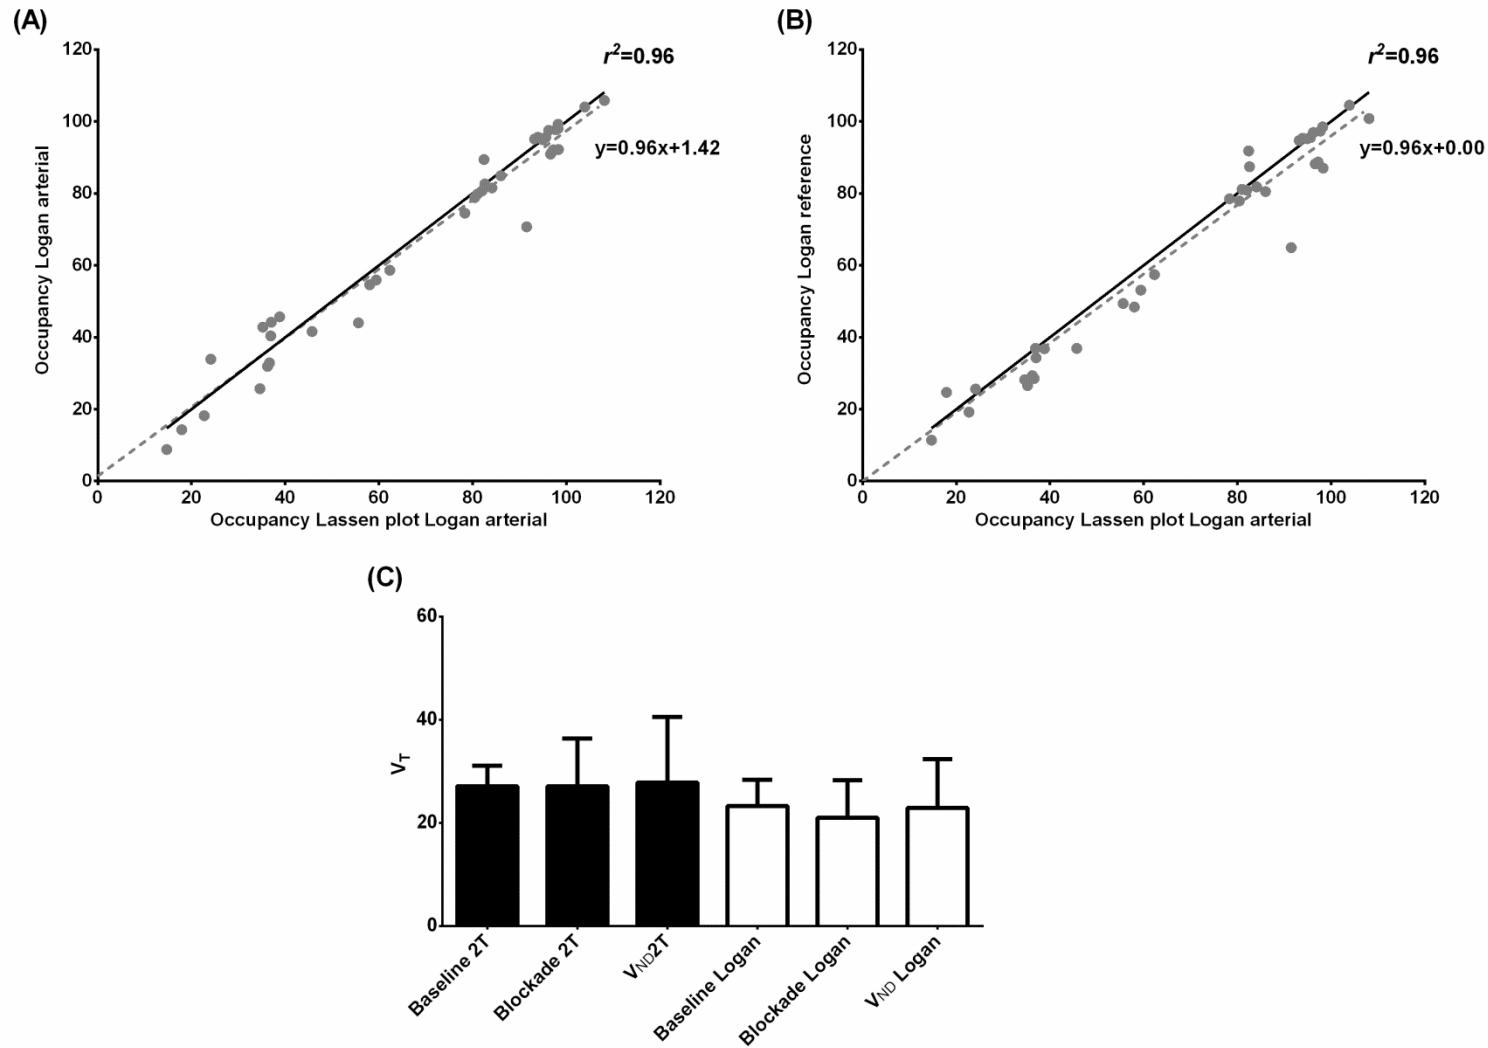

**SUPPLEMENTAL FIGURE 3.** Correlation between measured occupancy with the Lassen plot using Logan graphical analysis with arterial input function and the occupancy measured using Logan graphical analysis with arterial input function (A) and Logan non-invasive (B). Note the linear relationship between measurements and the proximity to the line of identity. Panel (C) shows the  $V_T$  values measured in the cerebellum at baseline and pre-blocking conditions, as well as derived  $V_{NDS}$ .

## REFERENCES:

1. Madsen K, Marner L, Haahr M, Gillings N, Knudsen GM. Mass dose effects and in vivo affinity in brain PET receptor studies - a study of cerebral 5-HT<sub>4</sub> receptor binding with [<sup>11</sup>C]SB207145. *Nucl Med Biol.* 2011;38:1085-1091.
2. Planeta-Wilson B, Labaree D, Gallezot JD, et al. A correction algorithm for carryover of tracer in paired C-11 studies: Application to the H-3 receptor antagonist [C-11]GSK189254. *Neuroimage.* 2010;52:S166.
